## Modeling subcortical white matter stimulation.

Melissa Dali<sup>1,2</sup>, Jennifer S. Goldman<sup>2</sup>, Olivier Pantz<sup>3</sup>, Alain Destexhe<sup>2</sup>, Emmanuel Mandonnet<sup>1</sup>,

**1 Department of Neurosurgery, Lariboisière Hospital, APHP, Paris, France**

**2 Paris-Saclay Institute of Neuroscience (NeuroPSI), CNRS, Gif-sur-Yvette, France**

**3 Université Côte d'Azur, CNRS, Inria, LJAD, France**

\* [melissa.dali@cnrs.fr](mailto:melissa.dali@cnrs.fr)

### Abstract

*Objective.* Intracranial electrical stimulation of subcortical axonal tracts is particularly useful during brain surgery, where mapping helps identify and excise dysfunctional tissue while avoiding damage to functional structures. Stimulation parameters are generally set empirically and consequences for the spatial recruitment of axons within subcortical tracts are not well identified. *Approach.* Computational modeling is employed to study the effects of stimulation parameters on the recruitment of axons: monophasic versus biphasic stimuli induced with monopolar versus bipolar electrodes, oriented orthogonal or parallel to the tract, for isotropic and anisotropic tracts. *Main results.* The area and depth of axonal activation strongly depend on tissue conductivity and electrode parameters. The largest activation area results from biphasic stimulation with bipolar electrodes oriented orthogonal to axonal fasciculi, for anisotropic and especially isotropic tracts. For anisotropic tracts, the maximal activation depth is similar regardless of whether a monopolar or bipolar electrode is employed. For isotropic tracts, bipolar parallel and monopolar stimulation activate axons deeper than orthogonal bipolar stimulation. Attention is warranted during monophasic stimulation: a blockade of action potentials immediately under cathodes and a propagation of action potentials under anodes are found. *Significance.* Considering the spatial patterns of blockade and activation present during monophasic stimulation with both monopolar and bipolar electrodes, biphasic stimulation is recommended to explore subcortical axon responses during intraoperative mapping. Finally, the precise effect of electrical stimulation depends on conductivity profiles of tracts, and as such, should be explicitly considered for each individual subject and tract undergoing intracranial mapping.

*Keywords:* Subcortical stimulation, intraoperative mapping, stimulation parameters, 1  
finite element model 2

### Introduction 3

Intra-operative functional brain mapping is performed during tumor excision, while 4  
patients are awake, to interrogate the organisation and operation of tissues. As such, 5  
functional mapping aids in the identification of non-operational tissues important to 6  
excise, and the prevention of neuropsychological complications induced by the excision 7

of operational tissue and tracts (fasciculi of axons). Despite the demonstrated utility of  
intra-operative functional mapping, there is no standard approach to choose the  
electrode parameters that are mostly set empirically [31]. Parameters of electrical  
stimulation include pulse shape, pulse duration ( $PW$ ), stimulus amplitude ( $I$ ), (Fig. 1),  
stimulation frequency, as well as the polarity and orientation of electrodes. To avoid  
tissue damage and ensure safe stimulation, the net charge injection (ie. the stimulus  
amplitude  $I$  multiplied by the stimulus duration  $PW$ ) must be equal to zero [19]. This  
condition can be reach using biphasic pulse (Fig. 1 C) instead of monophasic pulse  
(Fig. 1 A and Fig. 1 B). Although bipolar biphasic stimulation is often used during  
subcortical or cortical electrical stimulation [31], some clinical studies have also explored  
cortical and subcortical responses using bipolar monophasic [13,30], monopolar  
monophasic [10], and monopolar biphasic stimulation [10]. The effects of stimulation  
parameters are difficult to assess experimentally, because closed-loop electrodes are not  
routinely used for functional mapping and other fine assessments of the spatial-temporal  
effects of stimulation parameters would require implantation of further electrodes used  
only for research, and thus difficult to pass ethical review. Another issue is the  
variability of electrical conductivity in the white matter [26]. Previous studies have  
shown that the tissue anisotropy surrounding the electrode can alter the shape of the  
electric field and the subsequent neural response to stimulation [9,28]. To study the  
effects of stimulation parameters despite empirical limitations, computational modeling  
of neural responses to stimulus-induced electric fields are commonly used, especially in  
deep brain stimulation [2,18,20,27,33] but few have studied the effects of subcortical  
stimulation [8,16,17]. Gomez-Tames et al. [8] have recently assessed the influence of  
electrode diameter, and inter-electrode distance, as well as bipolar versus monopolar  
electrode using a head model with purely isotropic white matter. They show that for a  
fixed current amplitude, monophasic monopolar stimulation had a broader activation  
region that monophasic bipolar stimulation. The orientation of the bipolar electrode  
according the axonal tract was not taken into account. The studies of Mandonnet and  
Pantz [16,17] have shown that, using a biphasic pulse, a bipolar electrode oriented  
orthogonal to the axonal tract allowed broader activation of the tract than an electrode  
oriented parallel. Although subcortical modeling studies have contributed significantly  
to understanding the effects of stimulation parameters, the pulse shape variability as  
well as the influence of the axonal tract anisotropy with respect to the polarity and  
orientation of electrodes have not been yet investigated.

The present study aims to deepen the knowledge of the effects of stimulation  
parameters used to evoke subcortical responses. For this purpose, a model was  
developed to compute the response of a myelinated axons of a tract (either isotropic or  
anisotropic) to the potential field generated by various electrode parameters:  
monophasic versus biphasic pulses, through monopolar versus bipolar electrodes,  
oriented parallel versus orthogonal to tracts.

## Material and methods

### Two-part model

A volume conductor model for an axonal tract and bipolar (or monopolar) electrodes  
was coupled with a model of mammalian myelinated nerve fiber to study axonal  
recruitment resulting from stimuli. This method builds on models developed to  
successfully describe the effects of peripheral nerve stimulation [4,5], adapted for white  
matter stimulation of tracts in the central nervous system.

## Volume conductor model

We considered a bundle of axons enclosed in a half-cylindrical model (10 mm diameter) embedded in a sphere representing the surrounding white matter. The 3D FEM model was implemented on COMSOL Multiphysics (COMSOL Inc, Burlington, MA) software. Three models of electrodes were considered (Fig. 1, D-F): monopolar with distant reference (10 cm from the stimulating electrode), bipolar oriented parallel to the axonal tract, and bipolar oriented orthogonally to the axonal tract. The inter-electrode distance was 7 mm and the electrode diameter, 1 mm [16,17]. First, the fasciculus and the surrounding tissue were considered entirely isotropic with conductivity  $\sigma_{iso} = 0.14 S/m$  [6]. Then, the axonal tracts were considered anisotropic. We used the volume constraint method [11,32] to compute the values of the conductivity tensor. This method retains the volume between the anisotropic and the corresponding isotropic tensor:

$$\frac{4}{3}\pi\sigma_{iso}^3 = \frac{4}{3}\pi\sigma_1\sigma_2\sigma_3 \quad (1)$$

$\sigma_{iso}$  is the isotropic conductivity of the white matter,  $\sigma_1$ ,  $\sigma_2$  and  $\sigma_3$  are the eigenvalues of the conductivity tensor. Eq. Eq. 1 was parameterized in terms of two ratios [11]:

$$\frac{\sigma_3}{\sigma_1} = \omega_{31} \quad (2)$$

$$\frac{\sigma_3}{\sigma_2} = \omega_{32} \quad (3)$$

Using Eq. 1,2, and 3;  $\sigma_1$ ,  $\sigma_2$  and  $\sigma_3$  were expressed as follow:

$$\sigma_1 = \sigma_{iso}\omega_{31}^{-2/3}\omega_{32}^{1/3} \quad (4)$$

$$\sigma_2 = \sigma_{iso}\omega_{31}^{1/3}\omega_{32}^{-2/3} \quad (5)$$

$$\sigma_3 = \sigma_{iso}\omega_{31}^{1/3}\omega_{32}^{1/3} \quad (6)$$

The  $\sigma_3$  eigenvector was set as 9 times larger than the values of the perpendicular eigenvectors:  $\omega_{31} = \omega_{32} = 9$  [21]. The isotropic white matter conductivity was also applied to the surrounding tissue.

The potential fields through the volume conductor model resulting from electrode stimulation, were computed following the same method described in previously [5]. Briefly, the Poisson equation was solved using COMSOL, assuming quasi-static conditions [1] and appropriate Neumann Dirichlet boundary conditions [22].

## Axon model

The field simulation was then coupled to non-linear cable models of myelinated axons. The diameter size was fixed to 10  $\mu m$ , consistent with the diameter of myelinated axons (considering both axon and myelin) found in the central nervous system [14]. Spacing in the radial direction (X,Y) was set to 100  $\mu m$ . Spacing on longitudinal direction (Z), the internodal spacing, was set to 1000  $\mu m$  [12]. Models of mammalian myelinated fibers were implemented in Matlab (The MathWorks, Natick, Massachusetts). Chiu-Ritchie-Rogart-Stagg-Sweeney (CRRSS) equations [3] were adapted to 37°C [29] and used to describe non linear membrane dynamics. The internodal myelin was considered as a perfect insulator. Axonal activation was defined by the induction and propagation of action potentials (AP) along at most 10 nodes of Ranvier. The model included 15808 fibers with 41 nodes of Ranvier.

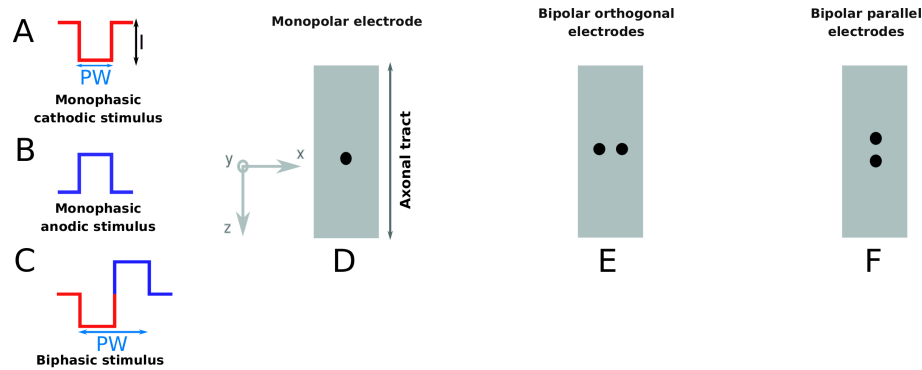

**Figure 1.** (A-C): Stimulus parameters. (A): monophasic cathodic (depolarizing) stimulus, (B): monophasic anodic (hyperpolarizing) stimulus, (C): biphasic stimulus, (D-F): electrode configurations (represented by black dots), longitudinal view of an axonal tract. (D): monopolar electrode, (E): bipolar orthogonal electrodes, (F): bipolar parallel electrodes

## Stimulation parameters

Monophasic versus biphasic stimulation applied with monopolar and bipolar electrodes (Fig. 1) were compared. Stimulus parameters were chosen in accordance with studies that record axono-cortical evoked potentials (ACEP;  $PW = 500-1000 \mu s$ ,  $I = 0.5 mA$  to  $10 mA$ ). The stimulus duration was  $500 \mu s$  for monophasic stimulation. In case of monopolar stimulation, cathodic (depolarizing) stimuli were only applied to the electrode placed on the axonal tract whereas anodic (hyperpolarizing) stimuli were applied to the distant contact (reference). Biphasic stimulation was considered without inter-stimulation delay. Each phase lasts  $500 \mu s$  for a total biphasic stimulation of  $PW = 1000 \mu s$ . All electrode and stimulation parameters are listed in Table. 1. Electrode orientations were placed orthogonal (transverse) or parallel to the axonal tract (Fig. 1). The values for stimulus amplitude  $I$  were 0.5, 1, 1.5, 2, 2.5, 3, 5 and  $10 mA$ .

| Electrode parameter | Stimulus shape | Fasciculus conductivity |
|---------------------|----------------|-------------------------|
| monopolar           | monophasic     | isotropic               |
| monopolar           | biphasic       | isotropic               |
| monopolar           | monophasic     | anisotropic             |
| monopolar           | biphasic       | anisotropic             |
| bipolar orthogonal  | monophasic     | isotropic               |
| bipolar orthogonal  | biphasic       | isotropic               |
| bipolar orthogonal  | monophasic     | anisotropic             |
| bipolar orthogonal  | biphasic       | anisotropic             |
| bipolar parallel    | monophasic     | isotropic               |
| bipolar parallel    | biphasic       | isotropic               |
| bipolar parallel    | monophasic     | anisotropic             |
| bipolar parallel    | biphasic       | anisotropic             |

**Table 1.** Electrode configuration, stimulus shape and axonal tract conductivity used in this study.

## Evaluation of axon activation

Maximal activation depth and area were evaluated as functions of electrode parameters (monopolar, bipolar orthogonal, or bipolar parallel), stimulus shape (monophasic or biphasic), electrical conductivities (isotropic or anisotropic), and stimulus amplitude. The maximal activation depth is defined as the distance between the electrode and the most deeply activated axon. The stimulation area quantifies the white matter surface activated by direct stimulation (cathode) or indirect stimulation (virtual cathodes).

## Results

### Action potential propagation: effect of pulse shape

We first studied the effect of pulse shape on action potential (AP) propagation (Fig. 2 A-C). Several phenomena result from bipolar orthogonal monophasic stimulation: activation by the cathode (Fig. 2 C-D), an activation under the anode due to virtual cathodes also called anode-make stimulation [25] (Fig. 2 C,E), and AP blocking under the cathode following initiation of an AP, but absence of propagation between the nodes of Ranvier (Fig. 2 C,F). Such a blocking phenomenon appears for axons very close to the cathode [23]. Therefore, only axons located in a shell around the electrode are stimulated (Fig. 3). AP blocking was mainly observed for monophasic stimulation regardless the stimulus amplitude and to a lesser extent for biphasic stimulation with amplitude greater than 5 *mA*.

### Activation map

The stimulated area is shown on cross-sections of the axonal tracts (Fig. 3, stimulus amplitude: 1 *mA*) for all the configurations tested. At this amplitude, for anisotropic tracts, maximal activation depth is similar giving 1.8 *mm* for monopolar and bipolar orthogonal configurations and 2 *mm* for bipolar parallel configuration. Considering isotropic tracts, maximum activation depth was 4.7 *mm* for the bipolar parallel configuration, 4.3 *mm* for the monopolar configuration and 3.9 *mm* for the bipolar orthogonal configuration. The activation map at 10 *mA* is shown in appendix Fig. 7. Note that at this amplitude, a blocking effect appears using biphasic stimulus. Thus, applying biphasic stimulus, maximal activation depth occurred under the both contacts of the electrode, whereas maximal activation depth occurred under the cathode in case of monophasic stimulation. Activation under the anode (due to virtual cathodes) was observed using monophasic stimulus.

### Influence of the stimulus amplitude

#### Anisotropic model

Considering an anisotropic axonal tract model as a function of the stimulus amplitude, Fig. 4A shows the maximal activation. As expected, the maximal activation depth increased with current amplitude. No difference of maximal activation depth was found between monophasic and biphasic stimulus. Activation depth difference between monopolar and bipolar orthogonal or bipolar parallel configuration was 0.1 *mm* below 10 *mA*. Since the points of the axon grid are separated by 0.1 *mm*, this difference was not considered significant. Maximum activation depth was reached using monopolar configuration at 10 *mA* (4.6 *mm*). Activation depth difference between monopolar and bipolar orthogonal or bipolar parallel was 0.3 *mm*. Note that the monopolar and bipolar parallel curves intersect at 5 *mA*.

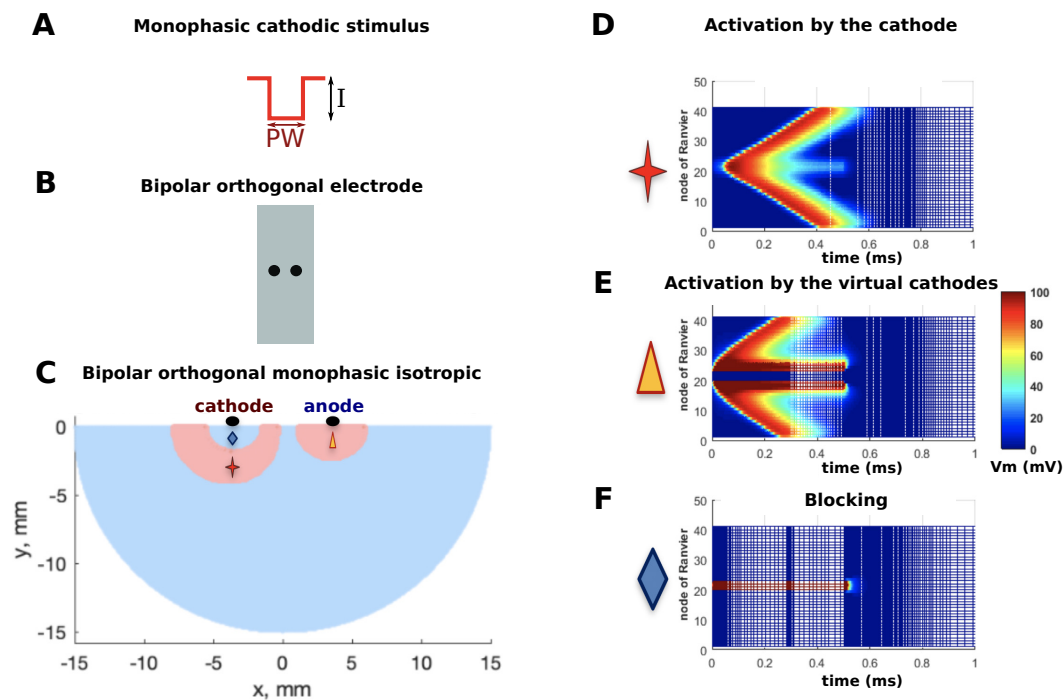

**Figure 2.** AP propagation or blocking along Nodes of Ranvier. (A-C): Example stimulation: bipolar orthogonal electrode with monophasic stimulus (1 mA). (D): Activation and AP propagation by direct cathodic stimulus, (E): Activation and AP propagation by virtual cathode, (F): AP is blocked.  $V_m$  is the membrane voltage of the axon.

The Fig. 4B, shows the variation of the activation area in function of stimulus amplitude. The largest activation area was obtained with bipolar biphasic stimulation (7.55 mm<sup>2</sup> at 0.5 mA to 53.7 mm<sup>2</sup> at 10 mA). Compared to monophasic stimulation, the biphasic stimulation recruited 79 %, 24 % and 3% more fibers respectively for bipolar orthogonal, monopolar, and bipolar parallel configurations respectively. The monopolar monophasic configuration recruited the smallest area (2.84 mm<sup>2</sup> at 0.5 mA to 28.0 mm<sup>2</sup> at 10 mA).

### Isotropic model

The same analysis was performed considering the axonal tract isotropic. No difference of maximal activation depth were found between monophasic and biphasic stimulus (Fig. 5A). However, the maximal activation depth difference was significant between monopolar, bipolar orthogonal, and bipolar parallel configurations. The maximal depth difference between monopolar and bipolar orthogonal increased linearly with increasing current amplitude  $I$  ( $y = 0.1955 \times I + 0.1144$ ,  $R^2 = 0.99$ ). The maximal depth difference between bipolar parallel and monopolar was stable (0.5 mm) from 1 mA to 5 mA. At 10 mA the monopolar and bipolar parallel curves intersect. Maximum activation depth was reached using monopolar and bipolar parallel configurations at 10 mA (10.7 mm).

The variation of activation area as a function of stimulus amplitude is shown in Fig. 5B. The largest activation area was obtained with bipolar biphasic stimulation

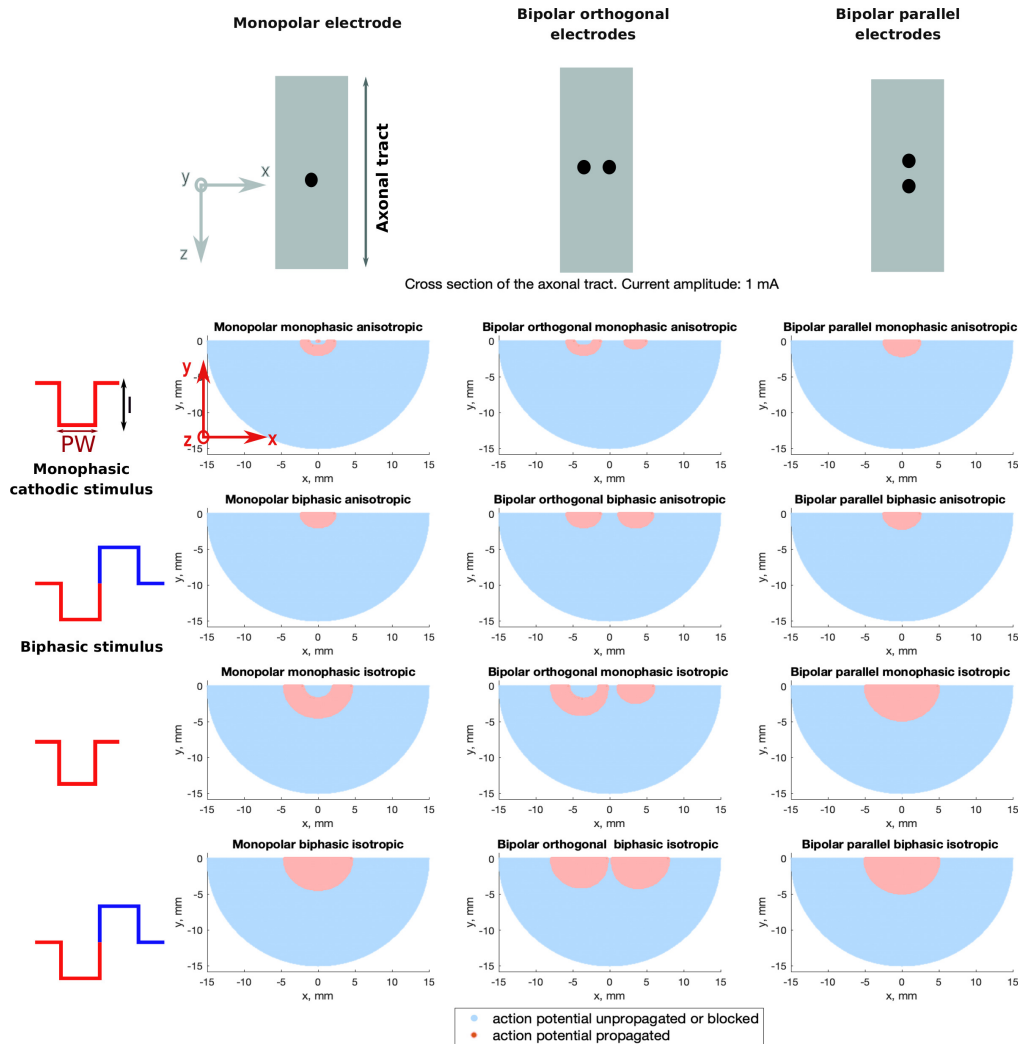

**Figure 3.** Map of stimulus effects. Cross-section of axonal tracts, representing axons activated, inactivated, or blocked by electrical stimulation. Stimulus amplitude: 1 mA.

(28.5 mm<sup>2</sup> at 0.5 mA to 182.9 mm<sup>2</sup> at 10 mA). Compared to monophasic stimulation, 165  
 the biphasic stimulation recruited 76 %, 21 % and 3% more fibers respectively for 166  
 bipolar orthogonal, monopolar, and bipolar parallel configurations. The monopolar 167  
 monophasic configuration activated the smallest area from 1 mA to 1.5 mA whereas 168  
 from 2 mA to 10 mA, the bipolar monophasic configuration performed more poorly. 169

### Influence of conductivity on the area stimulated 170

Comparison between isotropic and anisotropic case concerning maximal activation depth 171  
 and activation area are shown in Fig. 6 considering a biphasic pulse. Using isotropic 172  
 model overestimated the maximal activation depth and the activation area compared to 173  
 the anisotropic model. In averaged, activation area was 257 %, 391 % and 427 % more 174  
 important respectively for bipolar orthogonal, monopolar and bipolar parallel 175  
 configuration. The difference increased with current amplitude for the monopolar and 176  
 bipolar parallel configuration but decreased for the bipolar orthogonal configuration. 177  
 The maximal activation depth was 112 %, 134 % and 142 % more important 178



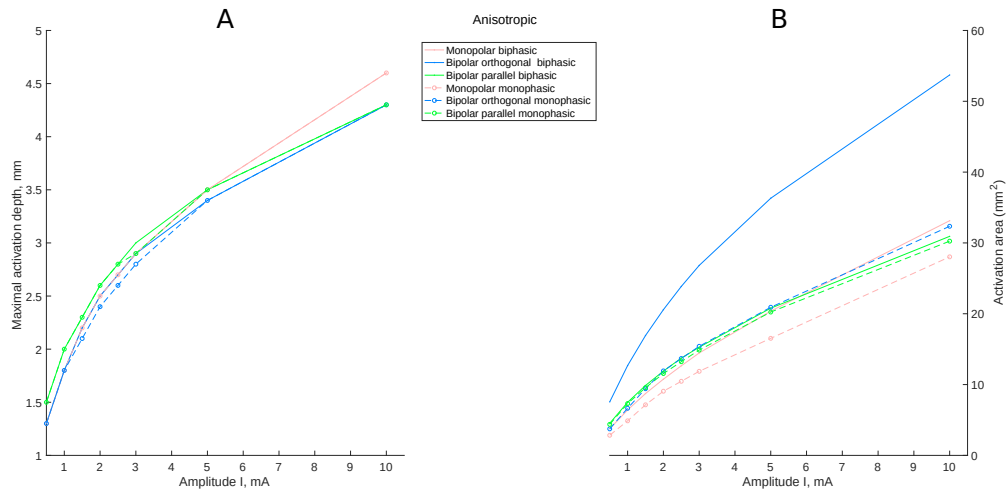

**Figure 4.** Anisotropic model. (A): Maximal activation depth and (B): activation area in function of the stimulus amplitude

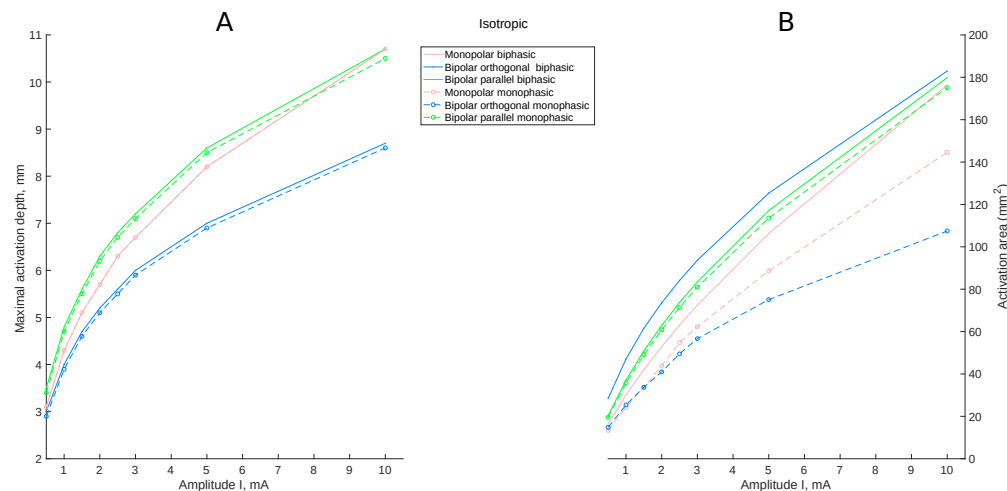

**Figure 5.** Isotropic model. (A): Maximal activation depth and (B): activation area in function of the stimulus amplitude

respectively for bipolar orthogonal, monopolar and bipolar parallel configuration. 179

## Discussion 180

In this study, we report the investigation of parameters used in surgical electrical stimulation of white matter tracts using computational models. The results show that different electrode parameters (bipolar parallel or orthogonal electrode, monopolar electrode, biphasic or monophasic stimulus) drastically modify the area and depth of tract activation. 181  
182  
183  
184

Biphasic bipolar orthogonal stimulation is widely used in surgery [31] and activates a larger total area than monopolar or bipolar parallel stimulation, however, axons lying between bipolar electrodes remain inactive. These results are in agreement with a 185  
186  
187  
188



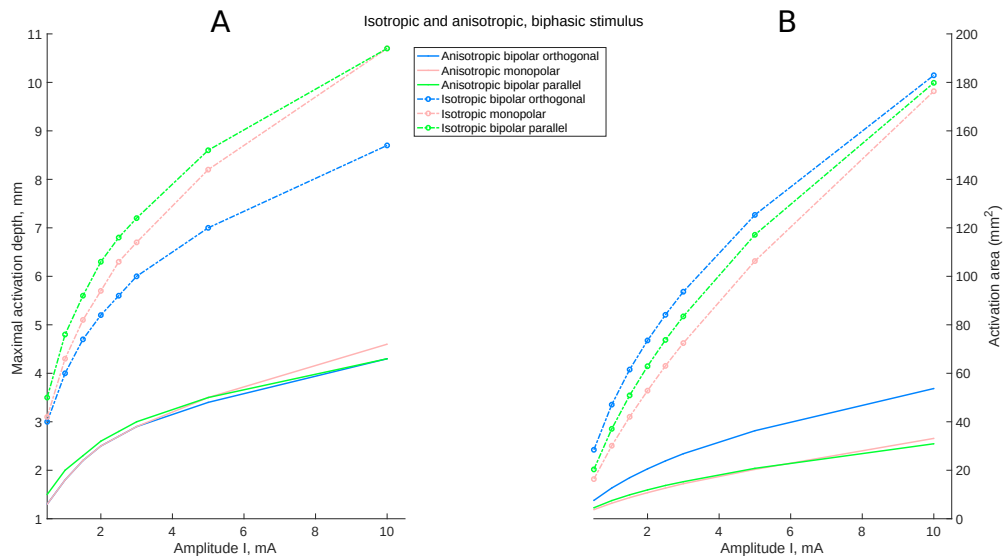

**Figure 6.** Comparison between isotropic and anisotropic model, using biphasic stimulus. (A): Maximal activation depth and (B): activation area in function of the stimulus amplitude.

previous study modelling white matter as a continuous bidomain medium [17]. Specifically, activation areas symmetrically surround the two poles of the bipolar biphasic orthogonal probe, rather than being located in between the two poles. This is in line with the fact that it is the second spatial derivative of the potential that drives the membrane depolarization (see the notion of "activating function" [15,24]). Hence, from a practical point of view, the effect of a biphasic bipolar orthogonal stimulation can be approximated as a double biphasic monopolar stimulation.

Consistent with the recent report of Gomez et al. for isotropic tracts, monopolar, monophasic stimulation caused a broader and deeper activation than monophasic stimulation with bipolar electrodes orthogonal to axon tracts [8]). However, our results show that monophasic stimulation with bipolar electrodes parallel to isotropic tract is far more effective than either monopolar or bipolar orthogonal electrodes. Further, the use of monophasic stimulation can induce potentially troublesome phenomena such as virtual cathodic activation (under the anode) and blocking of AP under the cathode. Notably, a non-symmetrical stimulation occurs below the contacts of the bipolar orthogonal electrode such that the stimulation zone is less well controlled.

The spatial features of axon recruitment by the different configurations were profoundly affected by anisotropy, both qualitatively and quantitatively. Assuming an anisotropic axonal tract, we found that there was no difference in activation depth using monopolar or bipolar configurations at low stimulus amplitude whereas the difference is clearly visible in an isotropic tract. The maximal depth and total activation area were far greater in isotropic compared to anisotropic models. The common result in both anisotropic and isotropic models was that bipolar orthogonal biphasic stimulation activates a larger total area than monopolar or bipolar parallel stimulation. Our findings indicate that inhomogeneities of conductivity have a drastic effect on the area recruited by the stimulation. It is thus important to precisely map the conductivities experimentally in order to enable the design of precise models. By extension, possible non-ohmic properties of the extracellular space [7] could also influence the area stimulated. In future studies, realistic geometrical head models including realistic

189  
190  
191  
192  
193  
194  
195  
196  
197  
198  
199  
200  
201  
202  
203  
204  
205  
206  
207  
208  
209  
210  
211  
212  
213  
214  
215  
216  
217

conductivities, fiber densities, and inhomogeneities of axon diameter should be considered to construct patient- and tract-specific predictions.

218

219

## Conflicts of interest

220

The authors declare no conflict of interest.

221

## Acknowledgment

222

Funding: This work was supported by the CRC chirurgie 2016 from AP-HP, INSERM through Interface Contracts for Hospitals, CNRS, and the European Community (Human Brain Project H2020-785907).

223

224

225

## Appendix

226

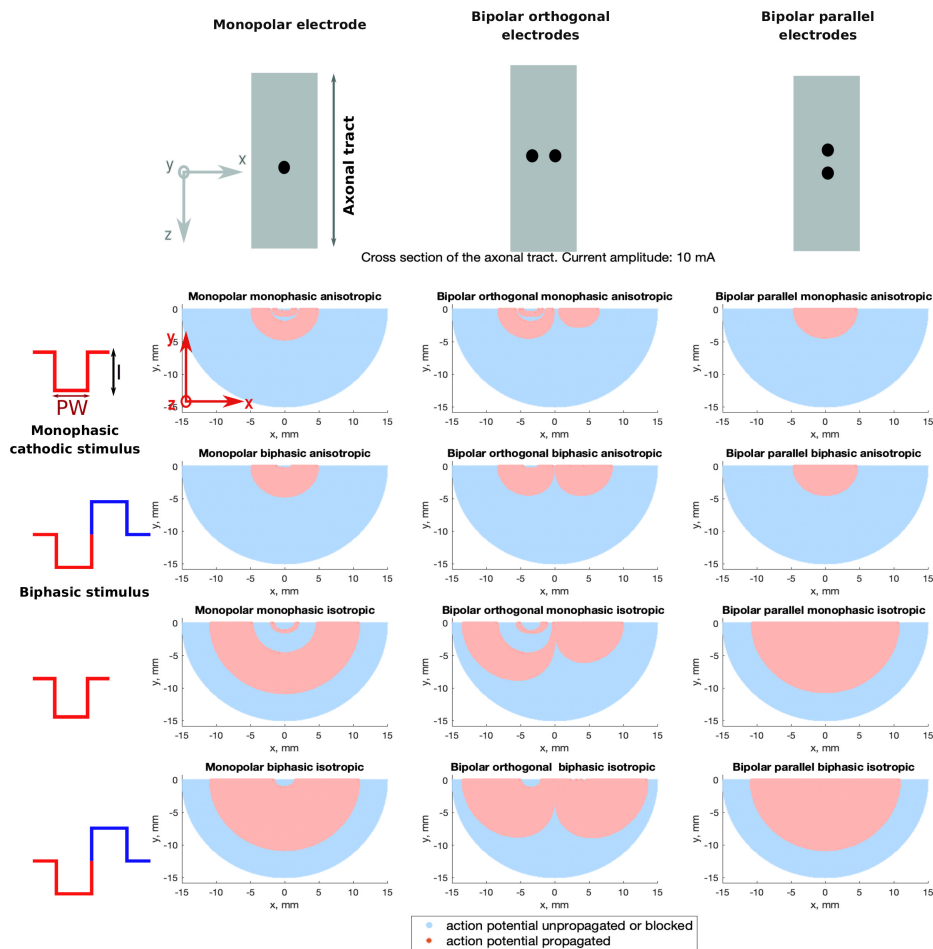

**Figure 7.** Map of stimulus effects. Cross-section of axonal tracts, representing axons activated, inactivated, or blocked by electrical stimulation. Stimulus amplitude: 10 mA.

## References

1. C. A. Bossetti, M. J. Birdno, and W. M. Grill. Analysis of the quasi-static approximation for calculating potentials generated by neural stimulation. Journal of neural engineering, 5(1):44, 2007.
2. A. Chaturvedi, C. R. Butson, S. F. Lempka, S. E. Cooper, and C. C. McIntyre. Patient-specific models of deep brain stimulation: influence of field model complexity on neural activation predictions. Brain stimulation, 3(2):65–77, 2010.
3. S. Y. Chiu, J. M. Ritchie, R. B. Rogart, and D. Stagg. A quantitative description of membrane currents in rabbit myelinated nerve. The Journal of physiology, 292:149–66, jul 1979.
4. M. Dali. Modélisation de l'interface entre une électrode multipolaire et un nerf périphérique. Optimisation des courants pour la stimulation neurale sélective. PhD thesis, Université Montpellier, 2017.
5. M. Dali, O. Rossel, D. Andreu, L. Laporte, A. Hernández, J. Laforet, E. Marijon, A. Hagège, M. Clerc, C. Henry, et al. Model based optimal multipolar stimulation without a priori knowledge of nerve structure: application to vagus nerve stimulation. Journal of neural engineering, 15(4):046018, 2018.
6. L. A. Geddes and L. E. Baker. The specific resistance of biological material—a compendium of data for the biomedical engineer and physiologist. Medical and biological engineering, 5(3):271–293, 1967.
7. J.-M. Gomes, C. Bédard, S. Valtcheva, M. Nelson, V. Khokhlova, P. Pouget, L. Venance, T. Bal, and A. Destexhe. Intracellular impedance measurements reveal non-ohmic properties of the extracellular medium around neurons. Biophysical journal, 110(1):234–246, 2016.
8. J. Gomez-Tames, T. Kutsuna, M. Tamura, Y. Muragaki, and A. Hirata. Intraoperative direct subcortical stimulation: comparison of monopolar and bipolar stimulation. Physics in Medicine & Biology, 63(22):225013, 2018.
9. W. M. Grill. Modeling the effects of electric fields on nerve fibers: influence of tissue electrical properties. IEEE Transactions on Biomedical Engineering, 46(8):918–928, 1999.
10. H. M. Hamer, H. O. Lüders, F. Rosenow, and I. Najm. Focal clonus elicited by electrical stimulation of the motor cortex in humans. Epilepsy research, 51(1-2):155–166, 2002.
11. B. Howell and C. C. McIntyre. Analyzing the tradeoff between electrical complexity and accuracy in patient-specific computational models of deep brain stimulation. Journal of neural engineering, 13(3):036023, 2016.
12. J. Hursh. Conduction velocity and diameter of nerve fibers. American Journal of Physiology-Legacy Content, 127(1):131–139, 1939.
13. C. J. Keller, C. J. Honey, P. Mégevand, L. Entz, I. Ulbert, and A. D. Mehta. Mapping human brain networks with cortico-cortical evoked potentials. Philosophical Transactions of the Royal Society B: Biological Sciences, 369(1653):20130528, 2014.

14. D. Liewald, R. Miller, N. Logothetis, H.-J. Wagner, and A. Schüz. Distribution of axon diameters in cortical white matter: an electron-microscopic study on three human brains and a macaque. Biological cybernetics, 108(5):541–557, 2014.
15. E. Mandonnet. Intraoperative electrical mapping: advances, limitations and perspectives. In H. Duffau, editor, Brain mapping: from neural basis of cognition to surgical applications, pages 101–108. Springer Science & Business Media, 2011.
16. E. Mandonnet and O. Pantz. On the activation of a fasciculus of axons. Rapport interne CMAP, (714), 2011.
17. E. Mandonnet and O. Pantz. The role of electrode direction during axonal bipolar electrical stimulation: a bidomain computational model study. Acta neurochirurgica, 153(12):2351–2355, 2011.
18. C. McIntyre and T. Foutz. Computational modeling of deep brain stimulation. Handbook of clinical neurology, 116:55–61, 2013.
19. D. R. Merrill, M. Bikson, and J. G. Jefferys. Electrical stimulation of excitable tissue: design of efficacious and safe protocols. Journal of neuroscience methods, 141(2):171–198, 2005.
20. S. Miocinovic, S. F. Lempka, G. S. Russo, C. B. Maks, C. R. Butson, K. E. Sakaie, J. L. Vitek, and C. C. McIntyre. Experimental and theoretical characterization of the voltage distribution generated by deep brain stimulation. Experimental neurology, 216(1):166–176, 2009.
21. P. W. Nicholson. Specific impedance of cerebral white matter. Experimental neurology, 13(4):386–401, 1965.
22. N. A. Pelot, B. J. Thio, and W. M. Grill. Modeling current sources for neural stimulation in consol. Frontiers in Computational Neuroscience, 12:40, 2018.
23. J. B. Ranck Jr. Which elements are excited in electrical stimulation of mammalian central nervous system: a review. Brain research, 98(3):417–440, 1975.
24. F. Rattay. Analysis of models for external stimulation of axons. IEEE transactions on biomedical engineering, (10):974–977, 1986.
25. B. J. Roth. Mechanisms for electrical stimulation of excitable tissue. Critical reviews in biomedical engineering, 22(3-4):253–305, 1994.
26. J. S. Shimony, R. C. McKinstry, E. Akbudak, J. A. Aronovitz, A. Z. Snyder, N. F. Lori, T. S. Cull, and T. E. Conturo. Quantitative diffusion-tensor anisotropy brain mr imaging: normative human data and anatomic analysis. Radiology, 212(3):770–784, 1999.
27. S. N. Sotiropoulos and P. N. Steinmetz. Assessing the direct effects of deep brain stimulation using embedded axon models. Journal of neural engineering, 4(2):107, 2007.
28. H. S. Suh, W. H. Lee, and T.-S. Kim. Influence of anisotropic conductivity in the skull and white matter on transcranial direct current stimulation via an anatomically realistic finite element head model. Physics in Medicine & Biology, 57(21):6961, 2012.

29. J. Sweeney, J. Mortimer, and D. Durand. Modeling of mammalian myelinated nerve for functional neuromuscular stimulation. In IEEE/Engineering in Medicine and Biology Society Annual Conference. IEEE, 1987.
30. M. Vansteensel, M. Bleichner, L. Dintzner, E. Aarnoutse, F. Leijten, D. Hermes, and N. Ramsey. Task-free electrocorticography frequency mapping of the motor cortex. Clinical Neurophysiology, 124(6):1169–1174, 2013.
31. M. Vincent, O. Rossel, M. Hayashibe, G. Herbet, H. Duffau, D. Guiraud, and F. Bonnetblanc. The difference between electrical microstimulation and direct electrical stimulation—towards new opportunities for innovative functional brain mapping? Reviews in the Neurosciences, 27(3):231–258, 2016.
32. C. H. Wolters, A. Anwander, X. Tricoche, D. Weinstein, M. A. Koch, and R. S. Macleod. Influence of tissue conductivity anisotropy on eeg/meg field and return current computation in a realistic head model: a simulation and visualization study using high-resolution finite element modeling. NeuroImage, 30(3):813–826, 2006.
33. N. Yousif, R. Bayford, S. Wang, and X. Liu. Quantifying the effects of the electrode–brain interface on the crossing electric currents in deep brain recording and stimulation. Neuroscience, 152(3):683–691, 2008.
